# Supplementary material
Source: PubMed Central journal article supplement (PMC2794302)
Supplement: djp414_1.pdf [file djp414_1.pdf]

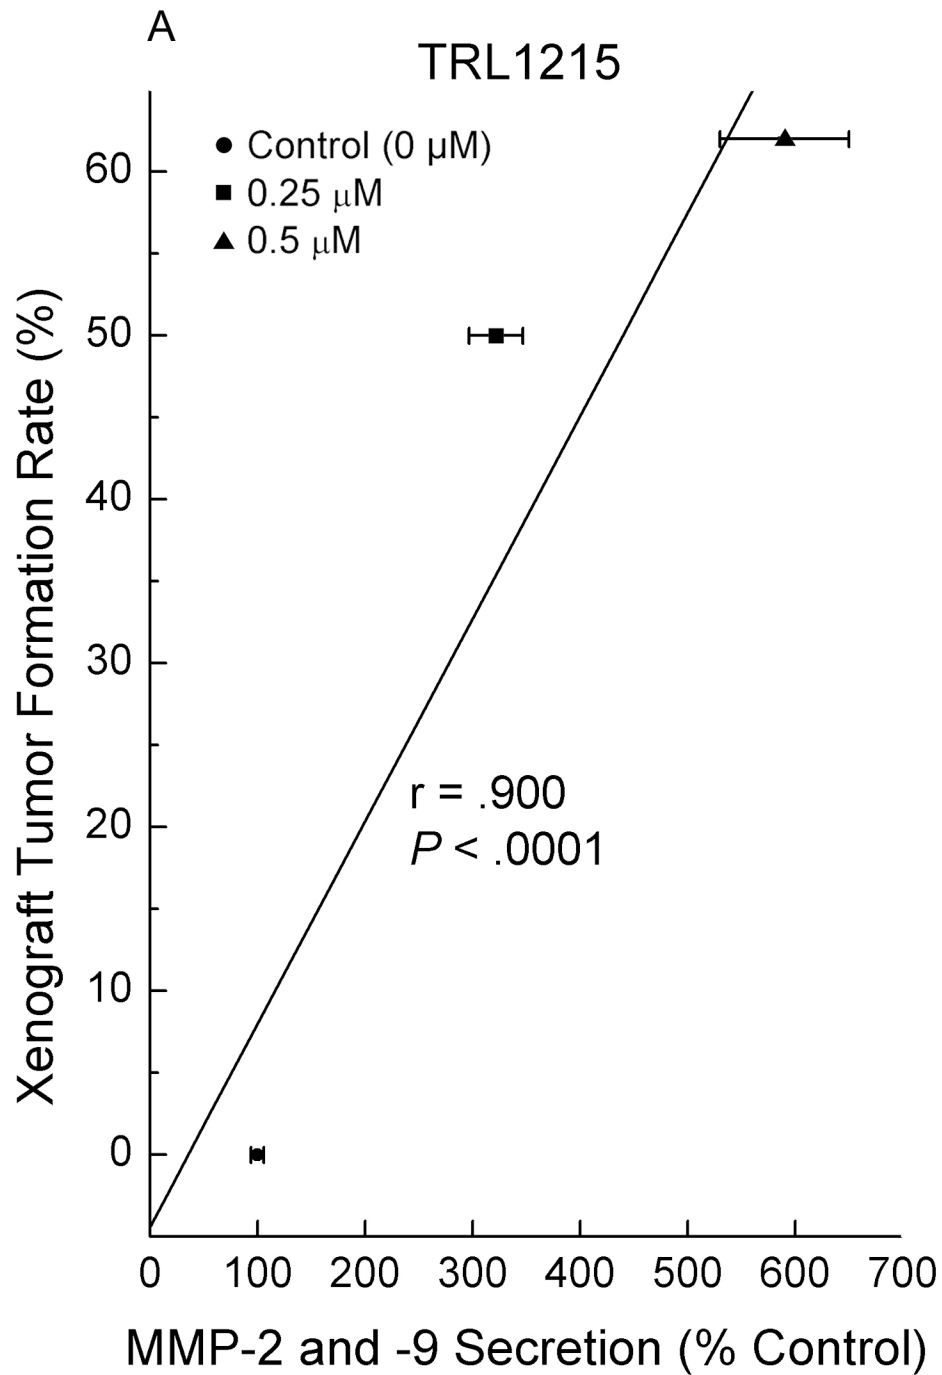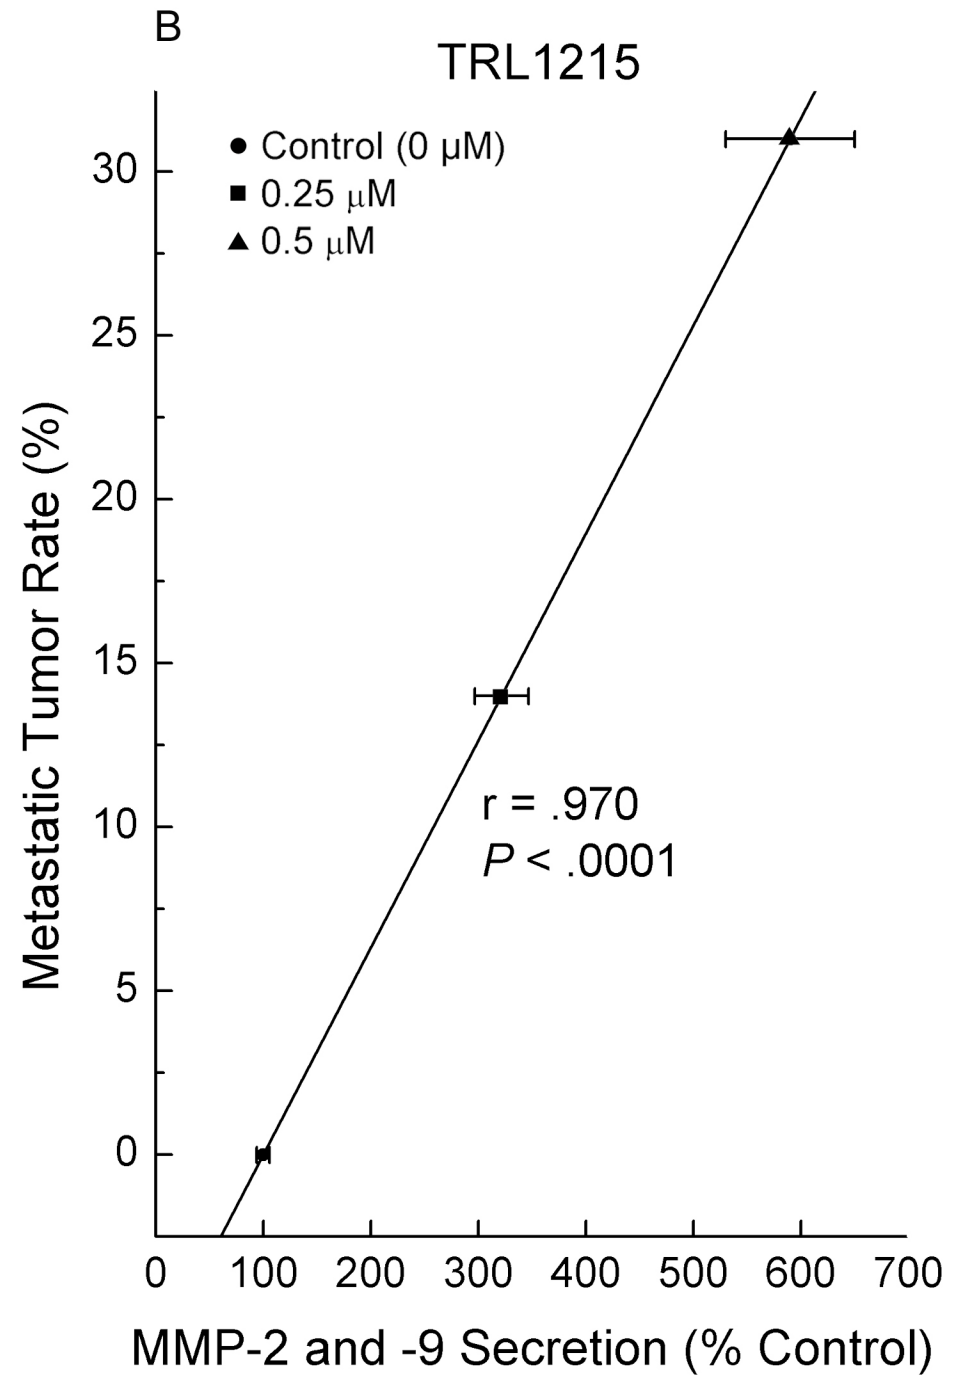

**Supplementary Figure 1.** Correlation between secreted matrix metalloproteinase-2 and -9 (MMP-2 and -9) (18 weeks) and post-inoculation xenograft tumor formation rate or metastatic tumor rate from TRL1215 cells chronically exposed to arsenite in vitro. A) Xenograft tumor formation rate. B) Metastatic tumor rate. Secreted MMP-2 and -9 activity data are from Figure 1,G, and xenograft tumor formation rate or metastatic tumor rate are from our prior work with this cell line (7). Both inoculation data and secreted MMP-2 and -9 activity data are derived from cells treated with arsenite for 18 weeks (0, 0.25, or 0.5  $\mu$ M). Secreted MMP-2 and -9 activity values are expressed as the mean with 95% confidence intervals (nine samples from three independent experiments). Tumor xenograft rate represents the incidence of mice inoculated with arsenite exposed cells ( $2 \times 10^6$  cells) that formed tumors and metastatic tumor rate represents the incidence of inoculated mice that had metastatic tumors occur over the 5 month observation period (7). *P* values were calculated by linear regression two-sided tests and further assessed by Pearson's correlation.
