# Supplementary material
Source: PubMed Central journal article supplement (PMC2794302)
Supplement: djp414_2.pdf [file djp414_2.pdf]

**Supplementary Table 1.** ODD induced by chronic sodium arsenite exposure assessed as nitron adducts using the IST method in TRL1215 cells (Figure 1,A).\*

| Arsenic Exposure | Control               | Arsenite               |                         |                          |
|------------------|-----------------------|------------------------|-------------------------|--------------------------|
|                  |                       | 0.25 $\mu$ M           | 0.5 $\mu$ M             | 1.0 $\mu$ M              |
| Weeks            | % Control (95% CI)    |                        |                         |                          |
| 2                | 100.0 (86.1 to 113.9) | 95.3 (74.3 to 116.2)   | 102.6 (82.7 to 122.4)   | 109.7 (91.0 to 128.4)    |
| 4                | 100.0 (50.0 to 150.0) | 223.8 (98.1 to 349.6)  | 156.7 (115.2 to 198.2)  | 157.2 (113.4 to 201.1)   |
| 5                | 100.0 (55.0 to 145.0) | 164.4 (96.4 to 232.4)  | 330.0 (302.6 to 357.4)  | 574.0 (525.8 to 622.2)   |
| 6                | 100.0 (87.1 to 112.9) | 194.6 (114.3 to 274.9) | 435.4 (313.3 to 557.5)  | 653.0 (368.0 to 937.9)   |
| 8                | 100.0 (73.7 to 126.3) | 249.8 (178.1 to 321.6) | 645.4 (475.1 to 815.7)  | 810.9 (507.7 to 1114.1)  |
| 10               | 100.0 (58.8 to 141.2) | 273.0 (190.1 to 355.9) | 630.0 (343.2 to 916.8)  | 781.1 (453.1 to 1109.2)  |
| 12               | 100.0 (88.2 to 111.8) | 217.2 (160.3 to 274.0) | 664.9 (412.1 to 917.7)  | 879.6 (680.3 to 1078.8)  |
| 14               | 100.0 (86.4 to 113.6) | 130.3 (96.7 to 163.8)  | 760.3 (492.8 to 1027.8) | 1035.2 (811.1 to 1259.3) |
| 16               | 100.0 (86.0 to 114.0) | 156.4 (100.3 to 212.5) | 836.4 (368.0 to 1304.7) | 1138.8 (796.7 to 1480.8) |
| 17               | 100.0 (69.3 to 130.7) | 176.7 (34.9 to 318.4)  | 353.8 (138.6 to 569.0)  | 775.1 (688.3 to 861.9)   |
| 18               | 100.0 (52.3 to 147.7) | 259.1 (19.6 to 483.8)  | 243.5 (120.4 to 366.7)  | 62.1 (50.8 to 73.5)      |
| 20               | 100.0 (89.5 to 110.5) | 81.1 (59.6 to 102.6)   | 81.7 (60.4 to 103.1)    | 99.8 (87.7 to 112.0)     |
| 22               | 100.0 (57.1 to 142.9) | 111.8 (103.2 to 120.5) | 123.6 (95.0 to 152.1)   | 137.4 (112.7 to 162.1)   |
| 24               | 100.0 (77.4 to 122.6) | 112.6 (43.9 to 143.8)  | 88.0 (70.8 to 105.2)    | 65.0 (29.6 to 100.5)     |
| 26               | 100.0 (67.0 to 133.1) | 93.0 (70.8 to 115.2)   | 93.4 (67.4 to 119.4)    | 87.8 (81.3 to 94.3)      |
| 28               | 100.0 (78.1 to 121.9) | 86.3 (75.6 to 97.1)    | 113.9 (98.0 to 129.8)   | 88.8 (85.1 to 92.5)      |
| 30               | 100.0 (70.6 to 129.5) | 79.8 (67.9 to 91.8)    | 107.4 (82.5 to 132.3)   | 102.7 (79.9 to 125.6)    |

\* ODD = oxidative DNA damage, IST = immuno-spin trapping. CI = confidence interval. Data shown represent the mean of nine samples in three independent experiments, and are plotted graphically in Figure 1,A.

**Supplementary Table 2.** ODD induced by chronic sodium arsenite exposure assessed as nitron adducts using the IST method in RWPE-1 cells (Figure 1,B).\*

| Arsenic Exposure | Control               | Arsenite               |                        |                        |
|------------------|-----------------------|------------------------|------------------------|------------------------|
|                  |                       | 1.0 $\mu$ M            | 2.5 $\mu$ M            | 5.0 $\mu$ M            |
| Weeks            | % Control (95% CI)    |                        |                        |                        |
| 2                | 100.0 (81.9 to 118.1) | 118.5 (101.6 to 135.5) | 99.4 (96.4 to 102.4)   | 118.6 (101.2 to 136.0) |
| 4                | 100.0 (78.6 to 121.4) | 130.6 (104.3 to 156.9) | 108.4 (95.5 to 121.3)  | 112.5 (95.4 to 129.3)  |
| 5                | 100.0 (80.0 to 120.0) | 142.7 (119.3 to 166.2) | 117.3 (100.5 to 134.2) | 106.4 (97.5 to 115.3)  |
| 6                | 100.0 (84.0 to 116.0) | 133.8 (107.0 to 160.6) | 96.6 (83.9 to 109.4)   | 92.9 (80.6 to 105.2)   |
| 8                | 100.0 (87.7 to 112.3) | 125.4 (104.9 to 145.9) | 105.1 (78.2 to 132.0)  | 91.3 (60.8 to 121.8)   |
| 10               | 100.0 (68.8 to 131.2) | 116.6 (91.8 to 141.4)  | 122.8 (79.0 to 166.6)  | 100.8 (62.1 to 139.5)  |
| 12               | 100.0 (51.8 to 148.2) | 97.8 (64.8 to 130.9)   | 99.6 (73.0 to 126.2)   | 96.3 (79.0 to 113.6)   |
| 14               | 100.0 (44.4 to 155.6) | 111.5 (57.1 to 165.9)  | 93.0 (54.1 to 131.8)   | 117.2 (77.1 to 157.3)  |
| 16               | 100.0 (58.8 to 141.2) | 81.9 (71.1 to 92.7)    | 92.0 (77.8 to 106.1)   | 105.5 (73.0 to 137.0)  |
| 18               | 100.0 (80.8 to 119.2) | 103.0 (84.3 to 121.8)  | 99.5 (77.8 to 121.3)   | 99.4 (82.4 to 116.4)   |
| 20               | 100.0 (61.3 to 138.7) | 108.4 (92.8 to 124.1)  | 88.0 (69.4 to 106.6)   | 101.6 (80.7 to 122.4)  |
| 22               | 100.0 (58.9 to 141.1) | 110.2 (93.7 to 126.7)  | 92.9 (70.5 to 115.3)   | 100.1 (79.8 to 120.4)  |
| 24               | 100.0 (63.2 to 136.8) | 111.9 (97.2 to 126.6)  | 97.9 (74.8 to 121.0)   | 98.7 (82.5 to 114.9)   |
| 28               | 100.0 (72.4 to 127.6) | 99.2 (43.6 to 154.8)   | 108.2 (51.9 to 164.5)  | 86.0 (69.6 to 102.4)   |
| 30               | 100.0 (85.6 to 114.4) | 112.3 (93.6 to 131.1)  | 107.2 (85.6 to 128.8)  | 119.2 (102.8 to 135.6) |

\* ODD = oxidative DNA damage, IST = immuno-spin trapping. CI = confidence interval. Data shown represent the mean of nine samples in three independent experiments, and are plotted graphically in Figure 1,B.

**Supplementary Table 3.** ODD induced by chronic sodium arsenite exposure assessed as nitron adducts using the IST method in UROtsa cells (Figure 4,A).\*

| Arsenic Exposure | Control               | Arsenite              |                        |                        |
|------------------|-----------------------|-----------------------|------------------------|------------------------|
|                  |                       | 0.25 $\mu$ M          | 0.5 $\mu$ M            | 1.0 $\mu$ M            |
| Weeks            | % Control (95% CI)    |                       |                        |                        |
| 2                | 100.0 (53.5 to 146.5) | 85.7 (43.8 to 127.6)  | 86.6 (67.4 to 105.8)   | 87.7 (70.6 to 104.7)   |
| 4                | 100.0 (79.8 to 120.2) | 90.1 (62.1 to 118.1)  | 93.5 (71.4 to 115.6)   | 106.2 (88.2 to 124.2)  |
| 6                | 100.0 (81.1 to 119.0) | 103.7 (78.8 to 128.7) | 109.2 (85.0 to 133.3)  | 110.8 (96.3 to 125.4)  |
| 8                | 100.0 (69.2 to 130.8) | 109.4 (96.6 to 122.2) | 124.8 (94.4 to 155.2)  | 105.0 (45.6 to 164.3)  |
| 10               | 100.0 (59.2 to 140.8) | 119.6 (71.1 to 168.1) | 132.0 (56.5 to 207.5)  | 88.3 (55.0 to 121.5)   |
| 12               | 100.0 (63.9 to 136.1) | 111.3 (72.9 to 149.7) | 113.4 (44.0 to 182.8)  | 84.6 (58.0 to 111.2)   |
| 14               | 100.0 (74.7 to 125.3) | 98.9 (83.5 to 114.3)  | 119.2 (79.9 to 158.5)  | 88.4 (75.6 to 101.2)   |
| 16               | 100.0 (74.5 to 125.5) | 102.2 (89.0 to 115.3) | 125.4 (104.1 to 146.7) | 102.7 (84.4 to 121.0)  |
| 18               | 100.0 (84.2 to 115.8) | 97.3 (89.8 to 104.9)  | 109.1 (63.0 to 155.3)  | 95.3 (76.2 to 114.4)   |
| 20               | 100.0 (84.8 to 115.2) | 102.9 (88.2 to 117.5) | 114.1 (94.0 to 134.3)  | 121.1 (109.7 to 132.5) |
| 22               | 100.0 (88.4 to 111.6) | 100.1 (93.8 to 106.4) | 101.1 (95.4 to 106.7)  | 104.1 (91.2 to 116.9)  |
| 24               | 100.0 (85.0 to 115.0) | 97.9 (57.8 to 138.0)  | 105.3 (63.4 to 147.3)  | 95.7 (87.4 to 104.0)   |
| 26               | 100.0 (85.0 to 115.0) | 110.5 (93.8 to 127.2) | 92.8 (83.1 to 102.4)   | 91.7 (74.7 to 108.7)   |
| 28               | 100.0 (85.8 to 114.2) | 91.7 (79.3 to 106.3)  | 94.4 (82.8 to 105.9)   | 112.1 (102.2 to 122.0) |
| 30               | 100.0 (80.2 to 119.9) | 92.9 (78.6 to 107.3)  | 87.6 (70.2 to 105.1)   | 87.0 (73.2 to 100.8)   |

\* ODD = oxidative DNA damage, IST = immuno-spin trapping. CI = confidence interval. Data shown represent the mean of nine samples in three independent experiments, and are plotted graphically in Figure 4,A.

**Supplementary Table 4.** ODD induced by chronic sodium arsenite exposure assessed as nitron adducts using the IST method in UROtsa/F35 cells (Figure 4,B).\*

| Arsenic Exposure | Control               | Arsenite               |                        |                        |
|------------------|-----------------------|------------------------|------------------------|------------------------|
|                  |                       | 0.25 $\mu$ M           | 0.5 $\mu$ M            | 1.0 $\mu$ M            |
| Weeks            | % Control (95% CI)    |                        |                        |                        |
| 2                | 100.0 (76.4 to 123.6) | 85.3 (48.9 to 121.7)   | 96.5 (88.7 to 104.4)   | 103.6 (91.1 to 116.0)  |
| 4                | 100.0 (68.9 to 131.2) | 103.3 (86.8 to 119.7)  | 116.8 (108.6 to 125.1) | 97.0 (58.3 to 135.7)   |
| 6                | 100.0 (72.9 to 127.1) | 82.3 (61.9 to 102.6)   | 88.1(69.1 to 107.1)    | 87.1 (66.7 to 107.5)   |
| 8                | 100.0 (92.1 to 107.9) | 122.8 (101.8 to 143.8) | 157.0 (137.7 to 176.3) | 194.2 (168.1 to 220.4) |
| 10               | 100.0 (89.0 to 111.0) | 201.4 (189.6 to 213.1) | 192.3 (169.5 to 215.2) | 181.8 (164.9 to 198.8) |
| 12               | 100.0 (81.0 to 119.0) | 163.1 (120.0 to 206.3) | 193.7 (165.7 to 221.7) | 216.6 (147.5 to 285.7) |
| 14               | 100.0 (69.1 to 130.9) | 163.3 (133.8 to 192.8) | 170.2 (138.2 to 185.0) | 220.8 (173.4 to 268.2) |
| 16               | 100.0 (87.4 to 112.6) | 126.0 (110.6 to 141.5) | 146.3 (135.9 to 156.7) | 225.2 (188.0 to 262.5) |
| 18               | 100.0 (91.0 to 109.0) | 121.8 (112.8 to 130.7) | 154.7 (137.7 to 171.7) | 208.2 (185.6 to 230.9) |
| 20               | 100.0 (70.5 to 129.5) | 139.3 (124.2 to 154.4) | 153.0 (121.9 to 184.1) | 213.3 (193.5 to 233.2) |
| 22               | 100.0 (91.9 to 108.1) | 117.9 (101.5 to 134.3) | 157.7 (136.7 to 178.6) | 192.6 (176.9 to 208.2) |
| 24               | 100.0 (87.6 to 112.4) | 118.3 (106.4 to 130.2) | 142.0 (128.3 to 155.7) | 192.3 (174.8 to 209.9) |
| 26               | 100.0 (88.8 to 111.2) | 101.0 (83.2 to 118.8)  | 137.1 (115.0 to 159.2) | 170.7 (152.8 to 188.7) |
| 28               | 100.0 (89.8 to 110.2) | 93.3 (72.3 to 114.3)   | 96.0 (79.2 to 113.1)   | 113.9 (95.3 to 132.5)  |
| 30               | 100.0 (68.2 to 131.8) | 94.3 (63.4 to 125.2)   | 106.7 (97.4 to 116.0)  | 100.3 (70.6 to 130.0)  |

\* ODD = oxidative DNA damage, IST = immuno-spin trapping. CI = confidence interval. Data shown represent the mean of nine samples in three independent experiments, and are plotted graphically in Figure 4,B.
